1 **Title:** Evolution-guided mutagenesis of the cytoplasmic incompatibility proteins: Identifying  
2 CifA's complex functional repertoire and new essential regions in CifB

3  
4

5

6 **Short Title:** Mutagenesis of CI proteins

7

8 **Authors:** J. Dylan Shropshire<sup>1,2\*</sup>, Mahip Kalra<sup>1,2</sup>, and Seth R. Bordenstein<sup>1,2,3,4\*</sup>

9

10 <sup>1</sup>Department of Biological Sciences, Vanderbilt University, Nashville, TN 37235, USA

11 <sup>2</sup>Vanderbilt Microbiome Initiative, Vanderbilt University, Nashville, TN 37235, USA

12 <sup>3</sup>Department of Pathology, Microbiology, and Immunology, Vanderbilt University, Nashville, TN  
13 37235, USA

14 <sup>4</sup>Vanderbilt Institute for Infection, Immunology, and Inflammation, Vanderbilt University Medical  
15 Center, Nashville, TN 37235, USA

16 \*Correspondence to:

17 J. Dylan Shropshire, Nashville, TN, 37235, Phone 423.930.6292, e-mail [shropxp@gmail.com](mailto:shropxp@gmail.com)

18 Seth R. Bordenstein, Nashville, TN, 37235, Phone 615.322.9087, e-mail

19 [s.bordenstein@vanderbilt.edu](mailto:s.bordenstein@vanderbilt.edu)

20

21 **ORCID iD:** J. Dylan Shropshire (<https://orcid.org/0000-0003-4221-2178>), Seth R. Bordenstein  
22 (<https://orcid.org/0000-0001-7346-0954>)

23 **Keywords:** cytoplasmic incompatibility, *Wolbachia*, prophage WO, *Drosophila melanogaster*,  
24 Two-by-One model

25

26 **Abstract**

27 *Wolbachia* are the world's most common, maternally-inherited, arthropod endosymbionts. Their  
28 worldwide distribution is due in part to a selfish drive system termed cytoplasmic incompatibility  
29 (CI) that confers a relative fitness advantage to females that transmit *Wolbachia* to their offspring.  
30 CI results in embryonic death when infected males mate with uninfected females but not infected  
31 females. Under the Two-by-One genetic model of CI, males expressing the two phage WO  
32 proteins CifA and CifB cause CI, and females expressing CifA rescue CI. While each protein is  
33 predicted to harbor three functional domains, there is no knowledge on how sites across these  
34 Cif domains, rather than in any one particular domain, contribute to CI and rescue. Here, we use  
35 evolution-guided, substitution mutagenesis of conserved amino acids across the Cif proteins,  
36 coupled with transgenic expression in uninfected *Drosophila melanogaster*, to determine the  
37 functional impacts of conserved residues evolving mostly under purifying selection. We report that  
38 amino acids in CifA's N-terminal unannotated region and annotated catalase-related domain are  
39 important for both complete CI and rescue, whereas C-terminal residues in CifA's putative domain  
40 of unknown function are solely important for CI. Moreover, conserved CifB amino acids in the  
41 predicted nucleases, peptidase, and unannotated regions are essential for CI. Taken together,  
42 these findings indicate that (i) all CifA amino acids determined to be involved in rescue are  
43 correspondingly involved in CI, (ii) an additional set of CifA amino acids are uniquely important  
44 in CI, and (iii) CifB amino acids across the protein, rather than in one particular domain, are all  
45 essential for CI. We discuss how these findings advance an expanded view of Cif protein evolution  
46 and function, inform the mechanistic and biochemical bases of Cif-induced CI/rescue, and  
47 continue to substantiate the Two-by-One genetic model of CI.

48

49

50 **Article summary**

51 *Wolbachia* are maternally-transmitted, intracellular bacteria that occur in approximately half of arthropod  
52 species worldwide. They can spread rapidly through host populations via the cytoplasmic incompatibility  
53 (CI) drive system. CI causes embryonic death when infected males mate with infected females, but  
54 offspring of infected females are rescued. Two proteins, CifA and CifB, underlie the genetic basis of CI and  
55 rescue, but how amino acid sites across these proteins contribute to CI and/or rescue remain unknown.  
56 Here, we employed evolution-guided, combinatorial mutagenesis on conserved amino acids to  
57 understand their relative contributions to CI and rescue. The results of this study reveal a phenotypic  
58 complexity underlying the expression of these proteins and provide relevance to the biochemical and  
59 mechanistic bases of CI and rescue.

60

61

## 62 Introduction

63 *Wolbachia* are maternally-inherited, intracellular  $\alpha$ -Proteobacteria that occur in 40-65% of  
64 all arthropod species (Charlesworth et al., 2019; Hilgenboecker et al., 2008; Weinert et al., 2015;  
65 Zug and Hammerstein, 2012). Residing in the cells of reproductive tissues, *Wolbachia* commonly  
66 cause a selfish drive system, cytoplasmic incompatibility (CI), that yields a relative advantage to  
67 females that transmit *Wolbachia* and thus increases *Wolbachia*'s rate of spread through the  
68 matriline (Rasgon, 2008; Turelli, 1994). CI causes embryonic death when *Wolbachia*-infected  
69 males mate with uninfected females and is rescued when the female is infected with a compatible  
70 *Wolbachia* strain (Fig. 1A) (LePage and Bordenstein, 2013; Serbus et al., 2008; Taylor et al.,  
71 2018). CI can act as a form of reproductive isolation between populations of different infection  
72 states (Bordenstein et al., 2001; Brucker and Bordenstein, 2012; Jaenike et al., 2006; Shropshire  
73 and Bordenstein, 2016). Additionally, this drive system has brought *Wolbachia* to the forefront of  
74 vector control efforts to combat Zika and dengue viruses because *wMel* *Wolbachia* from  
75 *Drosophila melanogaster* flies confer resistance to RNA arboviruses when transinfected into  
76 *Aedes* mosquitoes (Aliota et al., 2016; Caragata et al., 2016; Kittayapong et al., 2018; Moreira et  
77 al., 2009; O'Connor et al., 2012; O'Neill, 2018; X. Zheng et al., 2019). Notably, *wMel*-induced CI  
78 is the focus of this study.

79 CI's microbial genetic basis can be described by the Two-by-One genetic model (Fig. 1B)  
80 (Shropshire and Bordenstein, 2019) where the two phage WO genes *cifA* and *cifB* cause CI when  
81 dually expressed in testes (Beckmann et al., 2017; LePage et al., 2017; Shropshire and  
82 Bordenstein, 2019), and *cifA* rescues CI when singly expressed in ovaries (Chen et al., 2019;  
83 Shropshire et al., 2018; Shropshire and Bordenstein, 2019). The Cif proteins are divided into at  
84 least five phylogenetic clades, referred to as Types 1 – 5 (Bing et al., 2020; LePage et al., 2017;  
85 Lindsey et al., 2018). To date, this genetic model has been well supported using Type 1 *cif* genes  
86 from *wMel* (LePage et al., 2017; Shropshire et al., 2018; Shropshire and Bordenstein, 2019) and  
87 is consistent with results with Type 1 and 4 genes from *wPip* of *Culex pipiens* mosquitos  
88 (Beckmann et al., 2019b; Chen et al., 2019). However, the mechanism underlying CifA;B-induced  
89 CI and CifA-induced rescue remains mostly unresolved and limited to *in vitro* assays and  
90 structural homology-based predictive annotations discussed below.

91 CifA<sub>wMel</sub> is weakly predicted to encode a catalase-related domain (catalase-rel), a domain  
92 of unknown function 3243 (DUF), and a sterile-like transcription factor domain (STE) (Fig. 1C)  
93 (Lindsey et al., 2018). Catalase-rel domains are predicted to catalyze the degradation of reactive  
94 oxygen species (ROS) (Guy et al., 2005; Loew, 1900). DUF has a distant homology to globin-like  
95 domains and Puf-family RNA-binding domains, which influence the stability of eukaryotic RNAs

96 (Kumar and Subramaniam, 2018; Nishanth and Simon, 2020). Finally, STE domains mediate  
97 transcriptional induction in yeast (Wong Sak Hoi and Dumas, 2010). Structural homology  
98 predictions identify the STE and Puf-family RNA-binding domains across four and five  
99 phylogenetic Cif Types respectively, whereas the catalase-rel domain is only annotated in Type  
100 1 (Bing et al., 2020; Lindsey et al., 2018).

101 Conversely, CifB<sub>vMel</sub> harbors two putative PD-(D/E)XK-like nuclease domains (PDDEXK),  
102 and a ubiquitin-like-specific protease 1 domain (Ulp1) (Fig. 1C) (Beckmann et al., 2017; LePage  
103 et al., 2017; Lindsey et al., 2018). The Ulp1 domain is restricted to Type 1 CifB and cleaves poly-  
104 ubiquitin chains *in vitro* (Beckmann et al., 2017). Since mutation of the CifB Ulp1's catalytic motif  
105 ablates CifB's ability to contribute to CI when transgenically expressed in *D. melanogaster*, the  
106 Ulp1 domain has previously been described as the "enzymatic warhead" for CI induction  
107 (Beckmann et al., 2017). The function of the remaining sequence, including the PDDEXK dimer  
108 of Type 1 CifB, has not been assessed. We previously demonstrated that this remaining sequence  
109 comprises a CifB central core region found throughout Cif phylogenetic types (LePage et al.,  
110 2017). Moreover, the PDDEXK domains are also annotated in all phylogenetic Cif clades (Bing et  
111 al., 2020; LePage et al., 2017; Lindsey et al., 2018), and *in vitro* assays indicate that the PDDEXK  
112 domains of Type 4 CifB<sub>vPip</sub> nick DNA (Chen et al., 2019). As such, CifB's central core including  
113 the PDDEXK domains is likely important, if not one of the central aspects of its ability to contribute  
114 to CI. Finally, *in vitro* assays suggest that CifA and CifB can bind (Beckmann et al., 2017), but the  
115 importance of this binding *in vivo* and for phenotypic output remains unknown.

116 The aforementioned protein annotations and biochemical data represent a foundation to  
117 develop a more complete and nuanced understanding of how Cif proteins cause CI and rescue,  
118 but it remains unclear what kind of impact each domain and unannotated region have on the  
119 phenotypic output of these proteins. Here, we test the importance of conserved amino acids  
120 across the Cif proteins to CI and rescue via site-directed substitution mutagenesis and transgenic  
121 expression in *D. melanogaster*. We report three key findings. First, conserved sites in CifA's N-  
122 terminal unannotated region and the catalase-rel domain are important in both CI and rescue.  
123 Second, conserved sites in CifA's DUF are only involved in CI. Finally, all tested conserved sites  
124 in CifB are required for CI. Taken together, we identify sites in seven Cif mutants (both CifA and  
125 CifB) essential for complete CI, and determine that CifA's N-terminus is involved in both CI and  
126 rescue while the middle of the protein is only involved in CI. These results inform the mechanistic  
127 and biochemical basis of CI and rescue and lend further support for a Two-by-One genetic model  
128 where both CifA and CifB are functionally crucial for expression of CI.

129

130

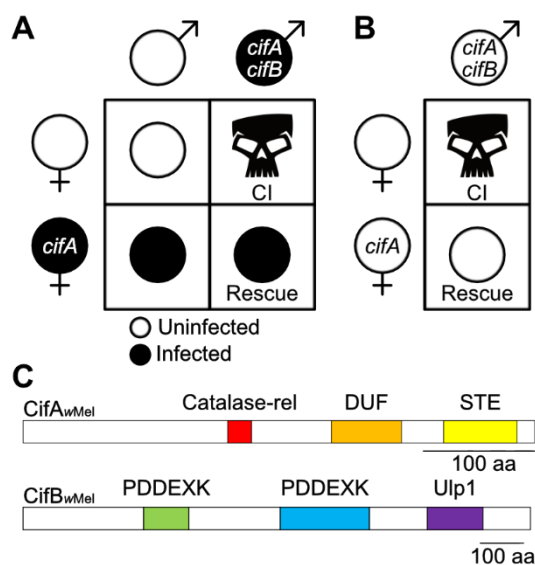

131

132 **Figure 1. Cytoplasmic incompatibility, the Two-by-One genetic model, and Cif protein architecture.** (A) CI is caused when  
133 *Wolbachia*-infected males expressing *cifA* and *cifB* mate with uninfected females. If females are infected and express *cifA* then  
134 offspring are rescued. (B) The Two-by-One genetic model indicates that males expressing *cifA* and *cifB*, even in the absence of an  
135 infection, can cause CI that can be rescued by uninfected females expressing *cifA*. (C) Schematic showing the protein architecture of  
136 CifA and CifB from the wMel *Wolbachia* of *D. melanogaster*. Annotations are based on a prior structural homology-based analyses  
137 (Lindsey et al., 2018).

138

## 139 Results

### 140 *CifA* mutants impact CI and rescue

141 Since CifA does not have any putative catalytic motifs, we used a previous sequence  
142 analysis of conserved amino acid residues in an alignment of phylogenetically diverse CifA  
143 proteins (Lindsey et al., 2018) to select highly conserved sites across the protein for mutagenesis.  
144 CifA<sub>1</sub>, CifA<sub>2</sub>, CifA<sub>3</sub>, and CifA<sub>4</sub> have combinatorial, alanine substitutions in the N-terminal  
145 unannotated region and putative catalase-rel, DUF, and STE domains, respectively (Fig. 2A).  
146 Alanine mutagenesis is used to analyze the importance of specific amino acids in protein  
147 sequences without contributing significant structural variation to the protein (Cunningham and  
148 Wells, 1989). We tested mutant *cifA* transgenes for their ability to (i) induce CI when dually  
149 expressed with wild type *cifB* in tests of uninfected males and (ii) rescue when singly expressed  
150 in ovaries of uninfected females. Using the GAL4-UAS system in *D. melanogaster* (Duffy, 2002),  
151 we predict that CI and/or rescue will not be recapitulated when CifA mutants are transgenically  
152 expressed if the sites mutated are crucial to the respective function. Notably, we use the nos-  
153 GAL4:VP16 driver throughout this study since it was previously shown to enable strong transgenic  
154 CI when dually expressing *cifA* and *cifB* transgenes (Shropshire and Bordenstein, 2019). Since

155 CI manifests as embryonic death, we measured the strength of CI induced under mutant  
156 transgenic expression by measuring the percentage of *D. melanogaster* embryos that hatch into  
157 larvae.

158 Consistent with prior studies (Shropshire and Bordenstein, 2019), dual *cifA;B* expression  
159 in males yielded nearly complete CI-defining embryonic death when mated to uninfected females  
160 (Mdn = 0% hatching) that was statistically comparable to *wMel*-induced CI ( $p > 0.99$ ), and it was  
161 rescued by *wMel*-infected females (Mdn = 95.4% hatching) (Fig. 2B). Transgenic dual expression  
162 of either *cifA<sub>1</sub>;B* (Mdn = 93.7% hatching;  $p > 0.99$ ) or *cifA<sub>3</sub>;B* (Mdn = 94.1% hatching;  $p > 0.99$ ) in  
163 males crossed to uninfected females revealed no statistically significant difference in hatching  
164 relative to the compatible, rescue cross; thus, mutating conserved sites in CifA's unannotated  
165 region and putative DUF ablates CI. Conversely, transgenic expression of *cifA<sub>4</sub>;cifB* caused hatch  
166 rates statistically comparable to *cifA;B*-induced CI (Mdn = 0% hatching;  $p > 0.99$ ), suggesting that  
167 mutation of conserved sites in the putative STE did not impact *cifA*'s ability to contribute to CI.  
168 Finally, transgenic expression of *cifA<sub>2</sub>;B* (Mdn=66.0%) yielded an intermediate phenotype  
169 whereby it was statistically different from both *cifA;B*-induced CI ( $p = 0.0006$ ) and rescue of  
170 transgenic CI ( $p = 0.0001$ ), indicating that the putative catalase-rel mutant induces a partial CI  
171 phenotype. Together, these results suggest the mutated sites in the unannotated region, catalase-  
172 rel, and DUF of CifA are important for CI-induction (Fig. 2B).

173 Next, we reciprocally tested if uninfected transgenic females singly expressing the same  
174 *cifA* mutants rescue *cifA;B*-induced CI (Fig. 2C). As above, dual *cifA;B* expressing males induced  
175 near-complete embryonic death consistent with strong CI (Mdn = 0% hatching), and this lethality  
176 could be rescued when the female expressed *cifA* (Mdn = 85.9% hatching). Transgenic  
177 expression of *cifA<sub>1</sub>* (Mdn = 0.00%;  $p < 0.0001$ ) and *cifA<sub>2</sub>* (Mdn=27.6%;  $p = 0.0390$ ), which failed  
178 to contribute to CI, also failed to rescue *cifA;B*-induced CI as compared to the standard transgenic  
179 rescue cross. Conversely, transgenic expression of *cifA<sub>3</sub>* (Mdn=91.2%;  $P > 0.9999$ ) and *cifA<sub>4</sub>*  
180 (Mdn=97.6%;  $P = 0.3039$ ) rescued *cifA;B*-induced CI at levels comparable to the standard  
181 transgenic rescue cross. These results suggest that the sites mutated in the unannotated and  
182 catalase-rel regions of CifA are important for rescue (Fig. 2C).

183



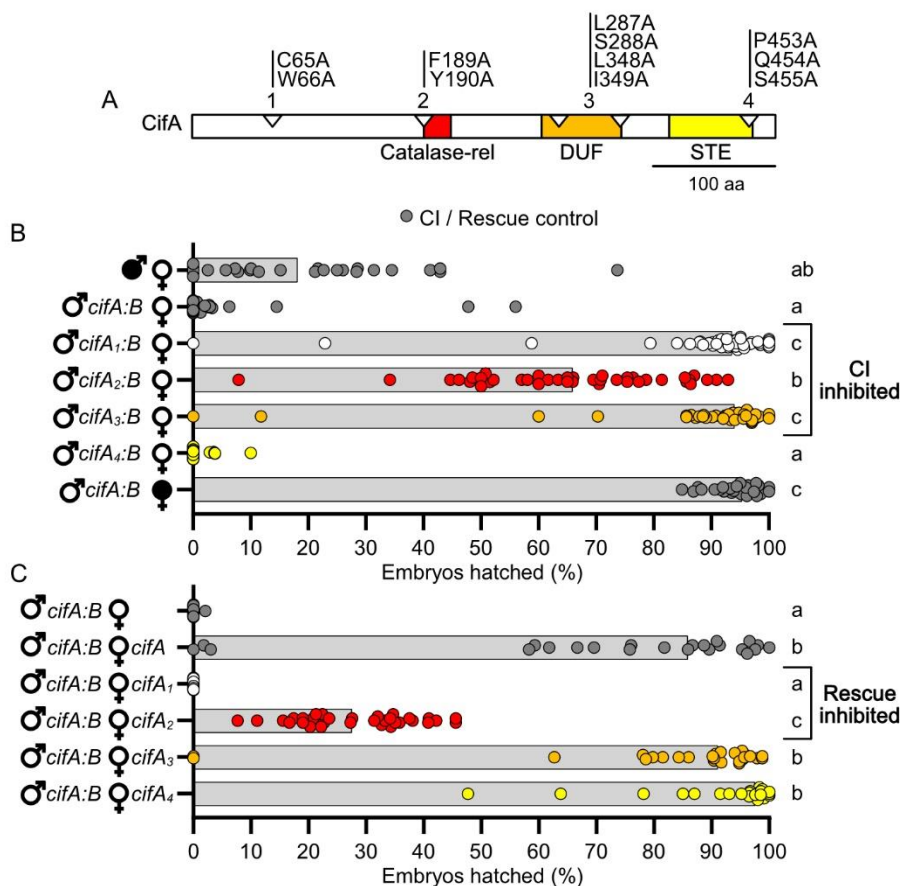

184

185

186

187

188

189

190

191

192

193

194

195

**Figure 2. *cifA<sub>1</sub>* and *cifA<sub>2</sub>* fail to cause or rescue CI, and *cifA<sub>3</sub>* can rescue but fails to cause CI.** (A) schematic showing the location of amino acid mutations in CifA relative to previously predicted domains (Lindsey et al., 2018). (B) Hatch rate experiment testing if *cifA* mutants can induce CI when dual expressed with *cifB* in uninfected males. (C) Hatch rate experiment testing if expressing *cifA* mutants can rescue transgenic CI when expressed in uninfected females. (B/C) Each dot represents the percent of embryos that hatched from a single male and female pair. Expressed genes are noted to the right of the corresponding sex. Gray bars represent median hatch rates for each cross and letters to the right indicate significant differences based on  $\alpha = 0.05$  calculated by Kruskal-Wallis and Dunn's test for multiple comparisons between all groups. Panel B was conducted three times and C was conducted twice. P-values are reported in Table S1.

194

### 195 *CifB* mutants ablate CI

196

197

198

199

200

201

202

203

204

Four CifB mutants were constructed based on a comparative sequence analysis of conserved residues (Lindsey et al., 2018). All CifB mutations are similarly alanine substitutions, with the exception of one glycine mutation of a conserved alanine (Fig. 3A). Glycine was chosen to replace alanine since it is comparably sized and would be less likely to impact protein structure than other amino acids. CifB<sub>1</sub>, CifB<sub>2</sub>, CifB<sub>3</sub>, and CifB<sub>4</sub> have mutations in the N-terminal unannotated region, first PDDEXK, second PDDEXK, and Ulp1 respectively (Fig. 3A). The Ulp1 mutation is the same used previously to test for the catalytic activity of the Ulp1 domain (Beckmann et al., 2017). We predict that CI will not be recapitulated when CifB mutants are transgenically expressed if the sites mutated are crucially important for CI-induction. As with CifA



205 mutants above, we tested mutant CifB for their ability to induce CI when dually expressed with  
 206 *cifA* in uninfected males.

207 As expected, dual *cifA;B* expression in uninfected males caused hatch rates statistically  
 208 comparable to wMel-induced CI ( $p > 0.99$ ), and it could be rescued by wMel-infected females  
 209 (Mdn = 93.9% hatching). However, transgenic expression of *cifA;B<sub>1</sub>* (Mdn = 96.3%;  $p < 0.0001$ ),  
 210 *cifA;B<sub>2</sub>* (Mdn = 95.6%;  $p < 0.0001$ ), *cifA;B<sub>3</sub>* (Mdn = 94.3%;  $p < 0.0001$ ), and *cifA;B<sub>4</sub>* (Mdn = 93.0%;  
 211  $p < 0.0001$ ) all failed to reduce hatch rates statistically comparable to *cifA;B*-induced CI (Mdn =  
 212 0.0%). These results specify that all mutated conserved sites, rather than any one site or domain  
 213 such as the previously reported catalytic site of Ulp1 (Beckmann et al., 2017), are important for  
 214 CifB in CI-induction.

215

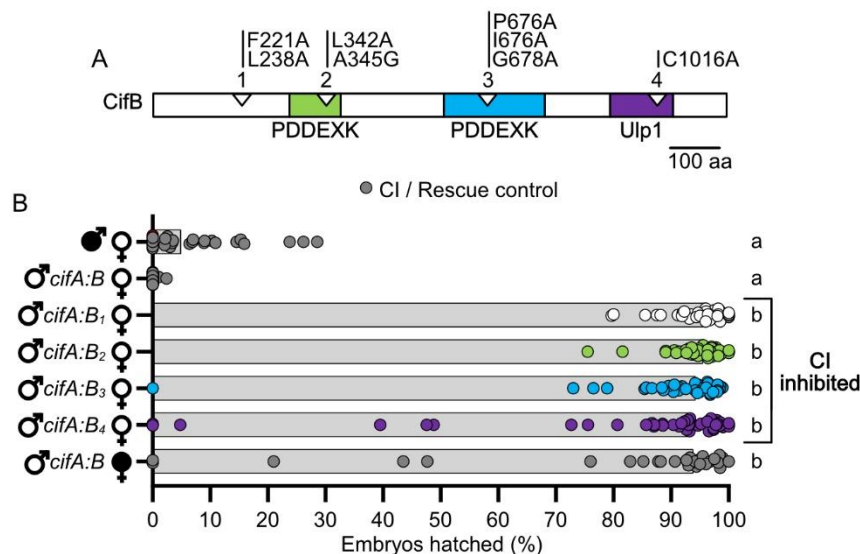

216

217 **Figure 3. All *cifB* mutants fail to contribute to CI.** (A) schematic showing the location of mutations in CifB relative to previously  
 218 predicted domains (LePage et al., 2017; Lindsey et al., 2018). (B) Hatch rate experiment testing if *cifB* mutants can induce CI when  
 219 dual expressed with *cifB* in uninfected males. Each dot represents the percent of embryos that hatched from a single male and female  
 220 pair. Expressed genes are noted to the right of the corresponding sex. Gray bars represent median hatch rates for each cross and  
 221 letters to the right indicate significant differences based on  $\alpha = 0.05$  calculated by Kruskal-Wallis and Dunn's test for multiple  
 222 comparisons between all groups. Panel B was conducted three times. P-values are reported in Table S1.

223

224

### 225 *CifB* selection analysis.

226 Prior selection analyses using a sliding window analysis indicated that CifA is under strong  
 227 purifying selection, and CifA's N-terminal unannotated region and catalase-rel domain are under  
 228 stronger purifying selection than C-terminal regions (Shropshire et al., 2018). Here, in order to  
 229 assess how engineered mutations and phenotypes align with selective pressures, we replotted  
 230 this analysis for CifA and, for the first time, applied a sliding window analysis of  $K_a$  and  $K_s$   
 231 (SWAKK) to assess the selective pressure on CifB (Fig. 4). SWAKK calculates the ratio of non-

232 synonymous to synonymous substitution rates ( $K_a/K_s$ ) in a pairwise alignment. Codons with ratios  
233 below one are considered under purifying selection, and those above one are under positive  
234 selection. In both cases, pairwise nucleotide alignments were *cif<sub>wMel</sub>* relative to *cif<sub>wHa</sub>*, which are  
235 modestly divergent Type 1 *cif* variants. For both CifA and CifB, we then plotted the amino acid  
236 substitutions to assess if they occur in regions of purifying or positive selection.

237 For CifA, all mutant sites were in areas of purifying selection (Fig. 4). However, the  
238 strongest purifying selection was surrounding the codons we mutated in the N-terminal  
239 unannotated region and catalase-rel domain. Intriguingly, the sites mutated near CifA's STE are  
240 under strong purifying selection, but the rest of the domain evolves neutrally. These results are  
241 in-line with our observations that the mutations in the N-terminal unannotated region and catalase-  
242 rel domain are involved in both CI and rescue, whereas weaker selection may act on the DUF  
243 domain which based on the results here are only involved in CI. Additionally, as with CifA, the  
244 majority of CifB is under strong purifying selection (Fig. 4). However, there are two clusters of  
245 amino acids that appear to be under strong positive selection. These residues are on the C-  
246 terminal side of CifB's second PDDEXK domain and in the unannotated region between the  
247 PDDEXK domain and Ulp1 domain. CifB<sub>1</sub>'s mutations fall within regions under neutral pressures,  
248 whereas the other CifB mutants are in regions under strong purifying selection.

249

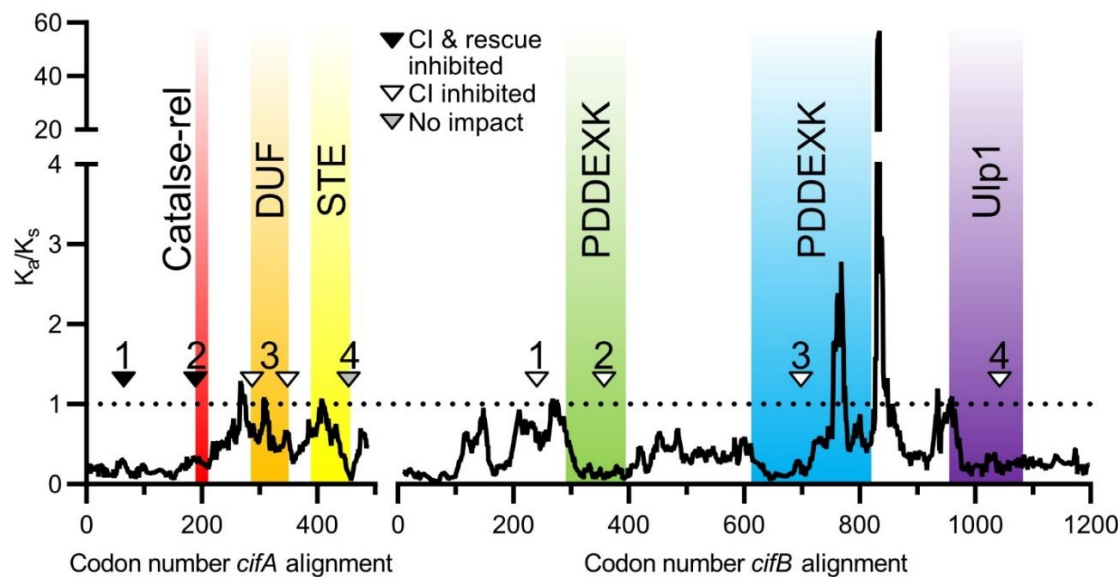

250  
251  
252 **Figure 4. Sliding window analyses reveal selective pressures on regions surrounding evolution-guided mutagenesis.**  
253 Analyses are based on pairwise alignments of *cifA* and *cifB* variants of *wMel* and *wHa* where the ratio of non-synonymous to  
254 synonymous substitutions ( $K_a/K_s$ ) are calculated along a 25 amino acid sliding window. The analysis of CifA was previously reported  
255 (Shropshire et al., 2018). Both proteins are largely under strong purifying selection, but CifB has two regions of positive selection.  
256 Sites mutated in CifA<sub>1</sub>, CifA<sub>2</sub>, CifA<sub>4</sub>, CifB<sub>2</sub>, CifB<sub>3</sub>, and CifB<sub>4</sub> are in regions of purifying selection. Sites mutated in CifA<sub>3</sub> and CifB<sub>1</sub> appear  
257 to be under neutral pressures or slight purifying selection. Triangles on protein schematics represent a selection of mutated amino  
258 acids. The specific amino acids mutated are further illustrated in Fig. 2A and 3A for CifA and CifB respectively. Annotations are from  
259 prior studies and based on structural-homology based analyses (Lindsey et al., 2018).

260

261 Cif structural predictions

262 There are numerous ways to interpret the impact of a mutation on a protein's function.  
263 These can include non-exclusive changes to catalytic motifs, ligand binding sites, or changes in  
264 local or global structures that ablate, enhance, or otherwise modify the phenotypic output of the  
265 protein. The CifB<sub>4</sub> mutation in the Ulp1 domain involves a putative cysteine catalytic motif common  
266 to deubiquitinase domains (Beckmann et al., 2017). Otherwise, no other catalytic motifs or binding  
267 sites have been identified in CifA<sub>wMeI</sub> or CifB<sub>wMeI</sub>. As such, we aimed to investigate the impact of  
268 these mutations on the structure of CifA and CifB proteins.

269 The Iterative Threading ASSEmbly Refinement (I-TASSER) webserver was used to  
270 generate a list of structural homologs from the protein databank (PDB) for each wild-type and Cif  
271 mutant protein and construct structural models based on these hits (Zhang, 2009). The shared  
272 and unique PDB hits for wild-type and mutant proteins are summarized in Fig. S1A and detailed  
273 in Table S2. The top 10 PDB hits for each protein were used to create structural models (Fig.  
274 S1B). Each model is generated with confidence measures in the form of C-scores and TM-scores.  
275 C-scores range from -5 to 2 where 2 is the highest confidence, and TM-scores range from 0-1  
276 where 1 is the highest confidence (Zhang, 2009). The similarity between wild-type and mutant  
277 structures was then assessed using the Alignment plugin in PyMOL 2.3.2 which provides values  
278 for the root-mean-square deviation (RMSD) of atomic positions. Higher RMSDs indicates a  
279 greater distance between the atoms of mutant proteins superimposed on the wild-type protein.  
280 Structural models were generated for CifA (C-score = -2.74; TM = 0.4±0.13), CifA<sub>1</sub> (C-score = -  
281 1.42; TM = 0.54±0.15; RMSD = 19.7), CifA<sub>2</sub> (C-score = -2.84; TM = 0.39±0.13; RMSD = 1.9), CifA<sub>3</sub>  
282 (C-score = -1.39; TM = 0.54±0.15; RMSD = 20.2), and CifA<sub>4</sub> (C-score = -1.43; TM = 0.54±0.15;  
283 RMSD = 19.8) (Fig. S1B). These low C-scores and TM-scores indicate that the I-TASSER  
284 predictions for CifA are not robust, and that variation in structure between wild-type and mutant  
285 proteins could be the result of poor threading templates. However, these results suggest that CifA  
286 is structurally most comparable to CifA<sub>2</sub> while the other structures are predicted to change to  
287 comparable degrees. Crucially, since the most divergent model, CifA<sub>3</sub>, remains rescue-capable  
288 and the second most divergent model CifA<sub>4</sub> remains functional in both CI and rescue it is unlikely  
289 that predictions of global structural variation assists an understanding of phenotypic ablation in  
290 CifA.

291 I-TASSER was also used to identify PDB hits and create structures for wild-type and  
292 mutant CifB. The shared and unique PDB hits for wild-type and mutant proteins are summarized  
293 in Fig. S1C and detailed in Table S2. As above, I-TASSER protein structures were then created  
294 based on these threading templates and compared for RMSD. Structural models (Fig. S1D) were

295 generated for CifB (C-score = -1.02, TM-score = 0.59±14), CifB<sub>1</sub> (C-score = -0.68, TM-score =  
296 0.63±14; RMSD = 1.7), CifB<sub>2</sub> (C-score = -1.03, TM-score = 0.58±14; RMSD = 10.6), CifB<sub>3</sub> (C-  
297 score = -1.07, TM-score = 0.58±14; RMSD = 2.2), CifB<sub>4</sub> (C-score = -0.65, TM-score = 0.63±14;  
298 RMSD = 2.2) (Fig. S1D). Together, these results suggest that all CifB mutants are structurally  
299 comparable to the wild-type protein. As with CifA, it remains unknown how small effects in protein  
300 structure may influence phenotypic ablation.

301

## 302 Discussion

303 CI's genetic basis involves a Two-by-One genetic model whereby *cifA;B* expressing males  
304 cause CI and *cifA* expressing females rescue CI (Beckmann et al., 2017, 2019b; LePage et al.,  
305 2017; Shropshire et al., 2018; Shropshire and Bordenstein, 2019). However, the mechanistic  
306 basis of *cifA;B*-induced CI and *cifA*-induced rescue remains largely unresolved. Here, we test the  
307 phenotypic impact of conserved sites (Lindsey et al., 2018) to CI and rescue across the Cif<sub>wMel</sub>  
308 proteins *in vivo* using site-directed mutagenesis and transgenic expression in *D. melanogaster*.  
309 We discuss the relevance of these findings, particularly the complex functional repertoire of CifA,  
310 to the Toxin-Antidote (TA) and Host Modification (HM) models of CI (Beckmann et al., 2019a;  
311 Shropshire et al., 2019) and the molecular basis of CifA;B-induced CI and CifA-induced rescue.

312 Crucially, phenotypic ablation caused by site-directed substitution mutagenesis has  
313 multiple possible and non-exclusive interpretations. First, a mutated site may be part of a catalytic  
314 motif. If so, mutagenesis may result in a significant inhibition of enzymatic activity related to CI  
315 and/or rescue induction. Second, the mutated site may be crucial for binding to host ligands,  
316 binding between CifA and CifB, or binding to nucleotide products. Additionally, amino acid  
317 substitutions may impact protein structure which in turn could also ablate function. Global folding  
318 abnormalities may block the enzymatic function of trans-acting domains or prevent binding  
319 elsewhere in the protein. Local or non-local changes to the structure can inhibit processes close  
320 to the mutated site in tertiary structure (Mi et al., 2019; Yang et al., 2020). These hypotheses are  
321 applicable to all mutant variants. Below, we place our mutagenesis work in the context of prior *in*  
322 *vivo* assays and bioinformatics to develop hypotheses regarding the mechanistic basis of CI and  
323 rescue.

324 First and foremost, our results indicate that CifA has several amino acids with overlapping  
325 functions in CI and rescue, as well as amino acids of specific importance to CI. Thus, it is plausible  
326 that, CifA's functional role in CI is comparable to that in rescue. Among the two sets of mechanistic  
327 models for CI, HM-based models predict that expression of CifA and CifB cause CI through host  
328 modifications during spermatogenesis, and rescue occurs by reversing those modifications in the

329 embryo (Shropshire et al., 2019). In the context of these results, CifA's role in modifying host  
330 factors in the testes may be comparable to its activity in rescue. Indeed, the HM-based mistiming  
331 model posits that CI causes a delay in nuclear apposition during the first mitosis due to slowed  
332 development of the male pronucleus, and rescue occurs when the development of the female  
333 pronucleus is comparably delayed (Ferree and Sullivan, 2006; Tram and Sullivan, 2002). Thus,  
334 under the mistiming model, CifA's overlapping function in CI and rescue could indicate that it is  
335 the primary driver of CI-induction and rescue, whereas CifB and CI-specific sites in CifA may  
336 provide adjunct functions necessary to access those targets when expressed in the testes.  
337 Conversely, the TA model predicts that CifB is paternally-transferred and the primary factor that  
338 causes an embryonic toxicity, and CifA is necessary to prevent self-induced toxicity in the testes  
339 and to rescue CifB-toxicity in the embryo (Beckmann et al., 2019a). Unlike the HM model, the TA  
340 model predicts that CifA must function exactly as an antidote when expressed in testes and  
341 embryos. Thus, our data are also in-line with these expectations, but as with the HM model, the  
342 TA model must be expanded to explain why sites in CifA's DUF domain are only essential for CI-  
343 induction if CifA's primary function is as an antidote in both tissues. Crucially, there is no evidence  
344 in the literature that CifB is transferred to the embryo, and we have proposed a HM model wherein  
345 CifA is both a primary inducer of CI in testes and rescue in embryos, while CifB is an accessory  
346 protein; this scenario enables a simple, one-step mutation scenario to the evolution of bidirectional  
347 CI between different strains of *Wolbachia* (Shropshire et al., 2018). More work will be necessary  
348 to understand CifA's cell biology and biochemistry to support it.

349 In the context of CifA, mutations in the N-terminal region completely ablate both CI and  
350 rescue. Intriguingly, prior selection analyses revealed that this region is under stronger purifying  
351 selection than the C-terminal end of the protein, suggesting that conservation in CifA's N-terminus  
352 may have a strong impact on its phenotypic output (Shropshire et al., 2018). Given that these N-  
353 terminal regions in both CifA and CifB are unannotated, we cannot yet provide a specific  
354 explanation for why these regions ablate CI and rescue. However, it is notable that N-terminal  
355 regions in *wPip* homologs of both CifA and CifB are predicted to encode ankyrin-interacting  
356 domains (Bonneau et al., 2018). Thus, these mutations may be responsible for ablating the  
357 binding capacity of Cif proteins to host ligands through either sequence or structural modifications  
358 of the protein, which requires further study.

359 When conserved sites within CifA's putative catalase-rel domain were mutated and dually  
360 expressed with CifB in males, 34.05% of embryos died indicating that CI capability was inhibited  
361 but not ablated. Similarly, when expressed in females crossed to CI-inducing CifA;B males, only  
362 34.05% of embryos survived, indicating that rescue was also significantly weaker. Thus, these



363 amino acids are important for causing complete CI and rescue phenotypes. Catalases are  
364 enzymes that are involved in the decomposition of hydrogen peroxide and protect cells from  
365 reactive oxygen species (ROS) damage (Loew, 1900). Some catalase-like domains are involved  
366 in host immune pathways that use ROS to combat disease (Govind, 2008; Zug and Hammerstein,  
367 2015), and high levels of ROS can cause male infertility in organisms as diverse as *Drosophila*  
368 and humans (Homa et al., 2015; Yu and Huang, 2015). Notably, while CifA is annotated with a  
369 catalase-rel domain (Lindsey et al., 2018), the closest sequence homolog is from *Helicobacter*  
370 *pylori*, which shares only ~22% sequence identity (Guy et al., 2005) and has no obvious active  
371 sites (Lindsey et al., 2018). Thus, it is unknown if CifA's catalase-rel is capable of degrading ROS,  
372 but it may otherwise attract or interact with ROS while not degrading them. For example, oxidative  
373 posttranslational modifications (PTM) can shift phenotypic output (Cai and Yan, 2013). CifA's  
374 catalase-rel may attract ROS, enabling PTM of itself, CifB, or other host targets. Since oxidative  
375 PTMs can be reversible (Cai and Yan, 2013), rescue may in part occur through the removal of  
376 these PTMs in the embryo. Alternatively, CifA may help to localize ROS to host targets to induce  
377 oxidative damage or otherwise modify host targets.

378         Moreover, *Wolbachia* presence is correlated with increases in ROS in *D. melanogaster*,  
379 *D. simulans*, *A. albopictus*, *A. polynesiensis*, and *T. urticae* (Brennan et al., 2012, 2008; Zug and  
380 Hammerstein, 2015), yielding additional support for CifA's function as a catalase-related protein  
381 (Lindsey et al., 2018). *Wolbachia*-induced increases in ROS levels correlate with DNA damage in  
382 *D. simulans* spermatocytes (Brennan et al., 2012) and an increase in lipid hydroperoxides in *D.*  
383 *melanogaster*, which are markers for ROS-induced oxidative damage (Driver et al., 2004).  
384 Intriguingly, the immune-related gene *kenny* (*key*) is upregulated in *Wolbachia*-infected *D.*  
385 *melanogaster*, and experimental upregulation of *key* in uninfected male flies yielded increased  
386 ROS levels, DNA damage, and decreased hatching that can be rescued when mated to infected  
387 females (Biwot et al., 2019). Together, these data support a role for ROS in CI's mechanism, but  
388 more work is necessary to link CifA's catalase-rel domain to ROS variation and determine if ROS  
389 are directly responsible for CI/rescue-induction or are otherwise a symptom of other modifications  
390 in gametogenesis.

391         The DUF in CifA shares distant homology to Puf-family RNA-binding proteins and is the  
392 only putative domain shared in all five CifA clades (Bing et al., 2020). Notably, mutating conserved  
393 residues in CifA's DUF domain revealed their specific importance to CI-induction but not for  
394 rescue. As such, this was the only domain in CifA wherein mutated sites were differentially  
395 important between the two phenotypes. RNA-binding proteins are important in transcriptional  
396 regulation and can influence the stability, localization, and translation of bound RNA. Puf-family

397 RNA-binding proteins typically influence the stability of mRNAs involved in cell maintenance,  
398 embryonic development, and other processes (Forbes and Lehmann, 1998; Macdonald, 1992;  
399 Parisi and Lin, 1999). For example, the *Drosophila* Puf-family RNA *Pumilio* (*pum*) is crucially  
400 involved in the establishment of patterning and abdominal segmentation in early embryonic  
401 development by suppressing the translation of maternal hunchback RNA in the *Drosophila*  
402 embryo (Forbes and Lehmann, 1998; Weidmann and Goldstrohm, 2012). Moreover, *pum* in  
403 spermatogenesis negatively regulates the expression of p53 which is involved in DNA repair and  
404 apoptosis, increases apoptosis, and reduces sperm production and fertility (Chen et al., 2012).  
405 Intriguingly, mitochondrial protein p32 is a candidate suppressor of CI based on *in vitro* pull-down  
406 assays using *Drosophila* lysates, and p32 regulates p53 activation (Ghate et al., 2019),  
407 suggesting that *pum* in spermatogenesis may influence similar pathways in CI. Additionally,  
408 *Wolbachia* infection has been shown to have a considerable impact on the fly transcriptome  
409 including sRNA profiles (Baião et al., 2019; Pinto et al., 2013; Y. Zheng et al., 2019). On their  
410 own, these correlations do not sufficiently link transcription with CI. However, as described above,  
411 *key* is significantly upregulated and causes rescuable hatch rate defects when experimentally  
412 overexpressed (Biwot et al., 2019). Additionally, *Wolbachia* upregulate the sRNA nov-miR-12  
413 which negatively regulates *pipsqueak* (*psq*), a DNA-binding protein that impacts chromatin  
414 structure (Horowitz and Berg, 1996; Siegmund and Lehmann, 2002), and knockdown of *psq*  
415 causes CI-like embryonic abnormalities and hatch rates in *D. melanogaster* (Y. Zheng et al.,  
416 2019). Thus, CifA's DUF may influence the expression of RNAs involved in the CI pathway, and  
417 by mutating the conserved site it may ablate the domain's ability to regulate these RNAs. It is also  
418 important to note that since the DUF mutant only prevented CifA from contributing to CI, it  
419 supports prior hypotheses that CifA has distinct mechanistic input to CI and rescue (Shropshire  
420 and Bordenstein, 2019). The phenotypic plasticity of CifA may be caused by distinct protein  
421 conformations in testes and ovaries or DUF-associated targets may only be present in testes.  
422 More work will be necessary to confirm that CifA can bind RNAs and what impact this binding has  
423 on downstream processes.

424 The final CifA domain shares homology to STE transcription factor proteins which are  
425 found predominantly in fungi and encode a sequence-specific DNA-binding motif that influences  
426 yeast reproduction through pheromone-responsive elements (Wong Sak Hoi and Dumas, 2010).  
427 Mutation of conserved sites within the STE had no impact on either CI or rescue. This was  
428 surprising since the STE domain appeared structurally conserved across four of the five CifA  
429 phylogenetic Types (Bing et al., 2020; Lindsey et al., 2018). However, while the sites mutated in  
430 the domain were conserved, the remainder of the domain appears to be evolving mostly neutrally



431 (Shropshire et al., 2018), suggesting the domain may be of lesser importance than N-terminal  
432 regions. Alternatively, since transgenes are expressed via host transcription and translation  
433 machinery, transgenic expression bypasses the need to export the proteins outside of *Wolbachia*  
434 and through the host-derived membranes that surround *Wolbachia* within the cell (Cho et al.,  
435 2011; Fattouh et al., 2019). As such, it is possible that the STE domain has an essential functional  
436 role in translation initiation and/or in protein export within *Wolbachia*, which may or may not be  
437 related to CI and/or rescue induction. Additional research will be necessary to determine if any  
438 component of the STE domain is necessary for CI and whether this domain is essential when  
439 expressed inside *Wolbachia*.

440 Type I CifB have two domains with homologs in the PDDEXK nuclease family, but they do  
441 not encode a canonical PD-(D/E)XK catalytic motif (Knizewski et al., 2007; Lindsey et al., 2018).  
442 This nuclease family is heavily involved in DNA restriction, repair, recombination, and binding  
443 (Knizewski et al., 2007). Mutations in conserved sites in either domain of Type I CifB<sub>w<sup>Mel</sup></sub> ablated  
444 CI phenotypes. Interestingly, homologs of CifB proteins from all five phylogenetic Types harbor  
445 putative nuclease domains (Lindsey et al., 2018), and the Type IV CifB have functional nucleases  
446 with canonical catalytic motifs and can induce CI upon dual expression with CifA (Chen et al.,  
447 2019). However, it remains biochemically unclear how these DNA nicks contribute to wild-type CI  
448 induction, and how this can be rescued by CifA expressing females. Moreover, while we show  
449 here that mutating conserved residues in either PDDEXK domain ablates CI induction, this does  
450 not confirm its role as a nuclease. For instance, these domains may be essential for the  
451 localization of Cif proteins to host DNA or other host targets. More work will be necessary to  
452 determine if CifB's PDDEXK domains are indeed active nucleases and why mutating these  
453 conserved sites ablates CI. Though, we note that ablation of CI by site-specific mutagenesis  
454 across the Cif proteins highlights the utility of a mechanistically-agnostic, gene nomenclature, like  
455 the CI factor (*cif*) gene nomenclature, as it is increasingly clear that CifB's role as a deubiquitinase  
456 or nuclease alone does not define its role in CI (Beckmann et al., 2019a; Shropshire et al., 2019).

457 CifB's final domain is a Ulp1 domain that contains the only known catalytic motif within the  
458 Cif proteins and is responsible for the deubiquitinase activity observed *in vitro* (Beckmann et al.,  
459 2017). Previous reports show that mutating the conserved cysteine active site ablates CI function  
460 in CifB<sub>w<sup>Pip</sup></sub> (Beckmann et al., 2017). Here, we confirm that mutating the same cysteine active site  
461 ablated CI in the CifB<sub>w<sup>Mel</sup></sub> protein. However, it is premature to claim that the Ulp1 domain is a  
462 "catalytic warhead" for CI (Beckmann et al., 2017) because several sites, when mutated, ablate  
463 the CI phenotype. Instead, it is evident that this site in the Ulp1 domain plays an important role in  
464 CI-induction but, when analyzed in context of results from mutating other regions, it is not the only

465 crucially important component of the protein. More work will be necessary to dissect the relative  
466 importance of the unannotated region, the nuclease domains, and the Ulp1 in CI's mechanism.

467 In conclusion, we report conserved amino acids in CifA and CifB that are essential for CI  
468 and rescue phenotypes. For CifA, conserved sites in the unannotated region and catalase-rel  
469 domain were important for CifA-induced CI and rescue, while the mutated sites in the DUF was  
470 specifically important to CI. For CifB, mutating conserved sites in an unannotated region, both  
471 PDDEXK nuclease domains and the Ulp1 domain were important in CifB-induced CI. These works  
472 provide additional support for the necessity of expressing both CifA and CifB proteins to cause CI  
473 and the importance of CifA's complex functional repertoire and new essential regions in CifB to  
474 the genotype-phenotype relationship and mechanism underpinning CI.

475

## 476 **Materials and methods**

### 477 Creating transgenic flies.

478 *cifA*<sub>1</sub> and *cifB*<sub>1</sub> mutant transgene variants were synthesized *de novo* at GenScript and  
479 cloned into a pUC57 plasmid. Site-directed mutagenesis was then performed by GenScript to  
480 produce the remaining three mutant variants of each gene (Fig 2A, 3A). UAS transgenic *cifA* and  
481 *cifB* mutant flies were then generated following previously described protocols (LePage et al.,  
482 2017). Briefly, each gene was subcloned into the pTIGER plasmid, which is a pUASp-based  
483 vector designed for germline expression. *cifA* and *cifB* transgenes were integrated into the *attp40*  
484 and *attp2* attachment sites in the *D. melanogaster* genome using PhiC31 integrase via embryonic  
485 injections at BestGene (LePage et al., 2017). All wild-type and transgenic nucleotide and amino  
486 acid sequences are reported in Table S3.

487

### 488 Fly rearing and strains.

489 *D. melanogaster* stocks *y*<sup>1</sup>*w*<sup>\*</sup> (BDSC 1495), *nos*-GAL4:VP16 (BDSC 4937), and UAS  
490 transgenic lines homozygous for *cifA*, *cifA* mutants, *cifB*, *cifB* mutants, *cifA*;B, and lines dual  
491 homozygous for *cifA* or *cifB* mutants with wild-type counterparts were maintained on a 12-hour  
492 light/dark cycle at 25°C on 50mL of standard media. Dual transgenic lines were generated through  
493 standard genetic crossings and were all homozygous viable. Uninfected lines were produced by  
494 tetracycline treatment as previously described (LePage et al., 2017). Infection status for all lines  
495 was regularly confirmed by PCR using Wolb\_F and Wolb\_R3 primers (Casiraghi et al., 2005).  
496 Genotyping was confirmed by PCR and Sanger sequencing using the primers in Table S4.

497

### 498 CI measurement assays.

499 CI was measured using hatch rate assays. To control for the paternal grandmother age  
500 effect on CI (Layton et al., 2019), virgin *nos*-GAL4:VP16 females were collected for the first 3  
501 days of emergence and aged 9-11 days before crossing to nonvirgin UAS transgenic males.  
502 Collections for maternal and paternal lineages were separated by a 7-day period. Individual male  
503 and female mating occurred in 8-oz *Drosophila* stock bottles with a grape-juice agar plate  
504 smeared with yeast and secured to the opening of each bottle with tape. Only the first emerging  
505 and youngest males were used to control for the younger brother effect and age effects on CI  
506 (Reynolds and Hoffmann, 2002; Yamada et al., 2007). Grape-juice agar plates were produced as  
507 previously described (LePage et al., 2017). The flies and bottles were incubated at 25°C for 24  
508 hours, at which time the grape plates were replaced with fresh plates and stored for an additional  
509 24 hours. After this, the initial number of embryos on each plate were counted. The plates were  
510 incubated at 25°C and after 30 hours, the number of unhatched embryos was counted. The  
511 percentage of embryos that hatched was calculated by dividing the number of hatched embryos  
512 by the total number of embryos and multiplying by 100. Plates with fewer than 25 embryos were  
513 excluded from analysis as previously described (LePage et al., 2017; Shropshire et al., 2018).

514

#### 515 Selection analysis.

516 Selection analysis of CifB was conducted using a sliding window analysis of  $K_a$  and  $K_s$   
517 (SWAKK). The SWAKK 2.1 webserver first generated a 1196 codon alignment (with gaps)  
518 between *cifB<sub>wMeI</sub>* and *cifB<sub>wHa</sub>* using ClustalW2 and then calculated the  $K_a/K_s$  ratio across the gene  
519 alignment using a sliding window of 25 codons and a jump size of 1 codon for SWAKK. The *cifA*  
520 SWAKK analysis was previously published and is based on the same parameters described  
521 above for *cifB* (Shropshire et al., 2018).

522

#### 523 Predicting mutational impact on protein structure.

524 The effect of mutations on protein structure was evaluated with the I-TASSER protein  
525 prediction tool (Zhang, 2009). I-TASSER generated protein tertiary structure predictions for Cif  
526 proteins and their mutants using the on-line server with default settings. Structures are build  
527 based on the top ten hits generated by querying the PDB. Hits were provided Z-scores that  
528 characterize the similarity to the query sequence. Higher Z-scores represent more confident  
529 matches. Z-scores are reported in the source data provided with this manuscript and PDB hits  
530 are detailed in Table S2. C-scores and TM-scores were generated for each tertiary structure. C-  
531 scores range from -5 to 2 where 2 is the highest confidence. TM-scores range from 0-1 where 1  
532 is the highest confidence.

533

534 *Statistical analysis.*

535 All statistical analyses for hatch rates were conducted in GraphPad Prism 8. Hatch rate  
536 statistical comparisons were made using Kruskal-Wallis followed by a Dunn's multiple comparison  
537 test. All p-values from statistical comparisons are provided in Table S1. Figure aesthetics were  
538 edited using Affinity Designer.

539

540 **Data availability**

541 All data generated in this study are available in the supplement of this manuscript.

542

543 **Acknowledgments**

544 We thank members of the Bordenstein lab, especially Brittany Leigh, for helpful comments and  
545 critiques during the course of this study. This work was supported by National Institutes of Health  
546 awards R01 AI132581 and R01 AI143725, National Science Foundation award IOS 1456778,  
547 and the Vanderbilt Microbiome Initiative to S.R.B., and a National Science Foundation Graduate  
548 Research Fellowship DGE-144519 to J.D.S. Any opinion, findings, and conclusions or  
549 recommendations expressed in this material are those of the authors(s) and do not necessarily  
550 reflect the views of the National Institutes of Health, the National Science Foundation, or  
551 Vanderbilt University.

552

553 **Competing interests**

554 J.D.S. and S.R.B. are listed as inventors on a provisional patent relevant to this work. S.R.B. is a  
555 coinventor on two other pending patents related to controlling arthropods.

556

557 **Author roles**

558 **J.D.S.:** Conceptualization, Formal Analysis, Funding Acquisition, Investigation, Methodology,  
559 Supervision, Validation, Visualization, Writing – Original Draft Preparation, Writing – Review &  
560 Editing. **M.K.:** Formal Analysis, Investigation, Writing – Review & Editing. **S.R.B.:**  
561 Conceptualization, Funding Acquisition, Methodology, Supervision, Writing – Original Draft  
562 Preparation, Writing – Review & Editing

563



## 565 References

- 566 Aliota, M.T., Peinado, S.A., Velez, I.D., Osorio, J.E., 2016. The *wMel* strain of *Wolbachia* reduces  
567 transmission of Zika virus by *Aedes aegypti*. *Sci. Rep.* 6, 28792.  
568 <https://doi.org/10.1038/srep28792>
- 569 Baião, G.C., Schneider, D.I., Miller, W.J., Klasson, L., 2019. The effect of *Wolbachia* on gene expression in  
570 *Drosophila paulistorum* and its implications for symbiont-induced host speciation. *BMC*  
571 *Genomics* 20, 465. <https://doi.org/10.1186/s12864-019-5816-9>
- 572 Beckmann, J., Bonneau, M., Chen, H., Hochstrasser, M., Poinot, D., Merçot, H., Weill, M., Sicard, M.,  
573 Charlat, S., 2019a. The Toxin–Antidote Model of Cytoplasmic Incompatibility: Genetics and  
574 Evolutionary Implications. *Trends Genet.* <https://doi.org/10.1016/j.tig.2018.12.004>
- 575 Beckmann, J., Ronau, J.A., Hochstrasser, M., 2017. A *Wolbachia* deubiquitylating enzyme induces  
576 cytoplasmic incompatibility. *Nat. Microbiol.* 2, 17007.  
577 <https://doi.org/10.1038/nmicrobiol.2017.7>
- 578 Beckmann, J., Sharma, G.D., Mendez, L., Chen, H., Hochstrasser, M., 2019b. The *Wolbachia* cytoplasmic  
579 incompatibility enzyme CidB targets nuclear import and protamine-histone exchange factors.  
580 *eLife* 8, e50026. <https://doi.org/10.7554/eLife.50026>
- 581 Bing, X.-L., Zhao, D.-S., Sun, J.-T., Zhang, K.-J., Hong, X.-Y., 2020. Genomic analysis of *Wolbachia* from  
582 *Laodelphax striatellus* (Delphacidae, Hemiptera) reveals insights into its “Jekyll and Hyde” mode  
583 of infection pattern. *Genome Biol. Evol.* <https://doi.org/10.1093/gbe/evaa006>
- 584 Biwot, J.C., Zhang, H.-B., Liu, C., Qiao, J.-X., Yu, X.-Q., Wang, Y.-F., 2019. *Wolbachia*-induced expression  
585 of kenny gene in testes affects male fertility in *Drosophila melanogaster*. *Insect Sci.*  
586 <https://doi.org/10.1111/1744-7917.12730>
- 587 Bonneau, M., Atyame, C., Beji, M., Justy, F., Cohen-Gonsaud, M., Sicard, M., Weill, M., 2018. *Culex*  
588 *pipiens* crossing type diversity is governed by an amplified and polymorphic operon of  
589 *Wolbachia*. *Nat. Commun.* 9. <https://doi.org/10.1038/s41467-017-02749-w>
- 590 Bordenstein, S.R., O’Hara, F.P., Werren, J.H., 2001. *Wolbachia*-induced incompatibility precedes other  
591 hybrid incompatibilities in *Nasonia*. *Nature* 409, 707–710. <https://doi.org/10.1038/35055543>
- 592 Brennan, L.J., Haukedal, J.A., Earle, J.C., Keddie, B., Harris, H.L., 2012. Disruption of redox homeostasis  
593 leads to oxidative DNA damage in spermatocytes of *Wolbachia*-infected *Drosophila simulans*.  
594 *Insect Mol. Biol.* 21, 510–520. <https://doi.org/10.1111/j.1365-2583.2012.01155.x>
- 595 Brennan, L.J., Keddie, B.A., Braig, H.R., Harris, H.L., 2008. The endosymbiont *Wolbachia pipientis* induces  
596 the expression of host antioxidant proteins in an *Aedes albopictus* cell line. *PloS One* 3, e2083.  
597 <https://doi.org/10.1371/journal.pone.0002083>
- 598 Brucker, R.M., Bordenstein, S.R., 2012. Speciation by symbiosis. *Trends Ecol. Evol.* 27, 443–451.  
599 <https://doi.org/10.1016/j.tree.2012.03.011>
- 600 Cai, Z., Yan, L.-J., 2013. Protein Oxidative Modifications: Beneficial Roles in Disease and Health. *J.*  
601 *Biochem. Pharmacol. Res.* 1, 15–26.
- 602 Caragata, E.P., Dutra, H.L.C., Moreira, L.A., 2016. Inhibition of Zika virus by *Wolbachia* in *Aedes aegypti*.  
603 *Microb. Cell* 3, 293–295. <https://doi.org/10.15698/mic2016.07.513>
- 604 Casiraghi, M., Bordenstein, S.R., Baldo, L., Lo, N., Beninati, T., Wernegreen, J.J., Werren, J.H., Bandi, C.,  
605 2005. Phylogeny of *Wolbachia pipientis* based on *gltA*, *groEL* and *ftsZ* gene sequences: clustering  
606 of arthropod and nematode symbionts in the F supergroup, and evidence for further diversity in  
607 the *Wolbachia* tree. *Microbiol.-Sgm* 151, 4015–4022. <https://doi.org/10.1099/mic.0.28313-0>
- 608 Charlesworth, J., Weinert, L.A., Araujo, E.V., Welch, J.J., 2019. *Wolbachia*, *Cardinium* and climate: an  
609 analysis of global data. *Biol. Lett.* 15, 20190273. <https://doi.org/10.1098/rsbl.2019.0273>



- 610 Chen, D., Zheng, W., Lin, A., Uyhazi, K., Zhao, H., Lin, H., 2012. Pumilio 1 Suppresses Multiple Activators  
611 of p53 to Safeguard Spermatogenesis. *Curr. Biol.* 22, 420–425.  
612 <https://doi.org/10.1016/j.cub.2012.01.039>
- 613 Chen, H., Ronau, J.A., Beckmann, J., Hochstrasser, M., 2019. A *Wolbachia* nuclease and its binding  
614 partner provide a distinct mechanism for cytoplasmic incompatibility. *Proc. Natl. Acad. Sci.* 116,  
615 22314–22321. <https://doi.org/10.1073/pnas.1914571116>
- 616 Cho, K.-O., Kim, G.-W., Lee, O.-K., 2011. *Wolbachia* bacteria reside in host Golgi-related vesicles whose  
617 position is regulated by polarity proteins. *PLoS One* 6, e22703.  
618 <https://doi.org/10.1371/journal.pone.0022703>
- 619 Cunningham, B.C., Wells, J.A., 1989. High-resolution epitope mapping of hGH-receptor interactions by  
620 alanine-scanning mutagenesis. *Science* 244, 1081–1085.  
621 <https://doi.org/10.1126/science.2471267>
- 622 Driver, C., Georgiou, A., Georgiou, G., 2004. The contribution by mitochondrially induced oxidative  
623 damage to aging in *Drosophila melanogaster*. *Biogerontology* 5, 185–192.  
624 <https://doi.org/10.1023/B:BGEN.0000031156.75376.e3>
- 625 Duffy, J.B., 2002. GAL4 system in *Drosophila*: a fly geneticist's Swiss army knife. *Genes*. N. Y. N 2000 34,  
626 1–15. <https://doi.org/10.1002/gene.10150>
- 627 Fattouh, N., Cazevieille, C., Landmann, F., 2019. *Wolbachia* endosymbionts subvert the endoplasmic  
628 reticulum to acquire host membranes without triggering ER stress. *PLoS Negl. Trop. Dis.* 13,  
629 e0007218. <https://doi.org/10.1371/journal.pntd.0007218>
- 630 Ferree, P.M., Sullivan, W., 2006. A genetic test of the role of the maternal pronucleus in *Wolbachia*-  
631 induced cytoplasmic incompatibility in *Drosophila melanogaster*. *Genetics* 173, 839–847.  
632 <https://doi.org/10.1534/genetics.105.053272>
- 633 Forbes, A., Lehmann, R., 1998. Nanos and Pumilio have critical roles in the development and function of  
634 *Drosophila* germline stem cells. *Dev. Camb. Engl.* 125, 679–690.
- 635 Ghate, N.B., Kim, J., Shin, Y., Situ, A., Ulmer, T.S., An, W., 2019. p32 is a negative regulator of p53  
636 tetramerization and transactivation. *Mol. Oncol.* 13, 1976–1992. <https://doi.org/10.1002/1878-0261.12543>
- 637
- 638 Govind, S., 2008. Innate immunity in *Drosophila*: Pathogens and pathways. *Insect Sci. Online* 15, 29–43.  
639 <https://doi.org/10.1111/j.1744-7917.2008.00185.x>
- 640 Guy, B., Krell, T., Sanchez, V., Kennel, A., Manin, C., Sodoyer, R., 2005. Do Th1 or Th2 sequence motifs  
641 exist in proteins?: Identification of amphipatic immunomodulatory domains in *Helicobacter*  
642 *pylori* catalase. *Immunol. Lett.* 96, 261–275. <https://doi.org/10.1016/j.imlet.2004.09.011>
- 643 Hilgenboecker, K., Hammerstein, P., Schlattmann, P., Telschow, A., Werren, J.H., 2008. How many  
644 species are infected with *Wolbachia*? - a statistical analysis of current data. *Fems Microbiol. Lett.*  
645 281, 215–220. <https://doi.org/10.1111/j.1574-6968.2008.01110.x>
- 646 Homa, S.T., Vessey, W., Perez-Miranda, A., Riyait, T., Agarwal, A., 2015. Reactive Oxygen Species (ROS) in  
647 human semen: determination of a reference range. *J. Assist. Reprod. Genet.* 32, 757–764.  
648 <https://doi.org/10.1007/s10815-015-0454-x>
- 649 Horowitz, H., Berg, C.A., 1996. The *Drosophila* pipsqueak gene encodes a nuclear BTB-domain-containing  
650 protein required early in oogenesis. *Dev. Camb. Engl.* 122, 1859–1871.
- 651 Jaenike, J., Dyer, K.A., Cornish, C., Minhas, M.S., 2006. Asymmetrical reinforcement and *Wolbachia*  
652 infection in *Drosophila*. *PLoS Biol.* 4, e325. <https://doi.org/10.1371/journal.pbio.0040325>
- 653 Kittayapong, P., Kaeothaisong, N.-O., Ninphanomchai, S., Limohpasmanee, W., 2018. Combined sterile  
654 insect technique and incompatible insect technique: sex separation and quality of sterile *Aedes*  
655 *aegypti* male mosquitoes released in a pilot population suppression trial in Thailand. *Parasit.*  
656 *Vectors* 11, 657. <https://doi.org/10.1186/s13071-018-3214-9>



- 657 Knizewski, L., Kinch, L.N., Grishin, N.V., Rychlewski, L., Ginalski, K., 2007. Realm of PD-(D/E)XK nuclease  
658 superfamily revisited: detection of novel families with modified transitive meta profile searches.  
659 BMC Struct. Biol. 7, 40. <https://doi.org/10.1186/1472-6807-7-40>
- 660 Kumar, G.A., Subramaniam, K., 2018. PUF-8 facilitates homologous chromosome pairing by promoting  
661 proteasome activity during meiotic entry in *C. elegans*. Development dev.163949.  
662 <https://doi.org/10.1242/dev.163949>
- 663 Layton, E.M., On, J., Perlmutter, J.I., Bordenstein, S.R., Shropshire, J.D., 2019. Paternal grandmother age  
664 affects the strength of *Wolbachia*-induced cytoplasmic incompatibility in *Drosophila*  
665 *melanogaster*. mBio 10. <https://doi.org/10.1128/mBio.01879-19>
- 666 LePage, D., Bordenstein, S.R., 2013. *Wolbachia*: Can we save lives with a great pandemic? Trends  
667 Parasitol. 29, 385–393. <https://doi.org/10.1016/j.pt.2013.06.003>
- 668 LePage, D.P., Metcalf, J.A., Bordenstein, Sarah R., On, J., Perlmutter, J.I., Shropshire, J.D., Layton, E.M.,  
669 Funkhouser-Jones, L.J., Beckmann, J., Bordenstein, Seth R., 2017. Prophage WO genes  
670 recapitulate and enhance *Wolbachia*-induced cytoplasmic incompatibility. Nature 543, 243–247.  
671 <https://doi.org/10.1038/nature21391>
- 672 Lindsey, A., Rice, D.W., Bordenstein, Sarah R., Brooks, A.W., Bordenstein, Seth R., Newton, I.L.G., 2018.  
673 Evolutionary genetics of cytoplasmic incompatibility genes *cifA* and *cifB* in prophage WO of  
674 *Wolbachia*. Genome Biol. Evol. 10, 434–451. <https://doi.org/10/gcvmkm>
- 675 Loew, O., 1900. A new enzyme of general occurrence in organisms. Science 11, 701–702.  
676 <https://doi.org/10.1126/science.11.279.701>
- 677 Macdonald, P.M., 1992. The *Drosophila pumilio* gene: an unusually long transcription unit and an  
678 unusual protein. Dev. Camb. Engl. 114, 221–232.
- 679 Mi, D., Ou, X., Li, P., Peng, G., Liu, Y., Guo, R., Mu, Z., Li, F., Holmes, K., Qian, Z., 2019. Glycine 29 Is  
680 Critical for Conformational Changes of the Spike Glycoprotein of Mouse Hepatitis Virus A59  
681 Triggered by either Receptor Binding or High pH. J. Virol. 93. [https://doi.org/10.1128/JVI.01046-](https://doi.org/10.1128/JVI.01046-19)  
682 19
- 683 Moreira, L.A., Iturbe-Ormaetxe, I., Jeffery, J.A., Lu, G., Pyke, A.T., Hedges, L.M., Rocha, B.C., Hall-  
684 Mendelin, S., Day, A., Riegler, M., Hugo, L.E., Johnson, K.N., Kay, B.H., McGraw, E.A., van den  
685 Hurk, A.F., Ryan, P.A., O'Neill, S.L., 2009. A *Wolbachia* symbiont in *Aedes aegypti* limits infection  
686 with dengue, Chikungunya, and Plasmodium. Cell 139, 1268–1278.  
687 <https://doi.org/10.1016/j.cell.2009.11.042>
- 688 Nishanth, M.J., Simon, B., 2020. Functions, mechanisms and regulation of Pumilio/Puf family RNA  
689 binding proteins: a comprehensive review. Mol. Biol. Rep. 47, 785–807.  
690 <https://doi.org/10.1007/s11033-019-05142-6>
- 691 O'Connor, L., Plichart, C., Sang, A.C., Brelsfoard, C.L., Bossin, H.C., Dobson, S.L., 2012. Open release of  
692 male mosquitoes infected with a *Wolbachia* biopesticide: field performance and infection  
693 containment. PLoS Negl. Trop. Dis. 6, e1797. <https://doi.org/10.1371/journal.pntd.0001797>
- 694 O'Neill, S.L., 2018. The use of *Wolbachia* by the World Mosquito Program to interrupt transmission of  
695 *Aedes aegypti* transmitted viruses. Adv. Exp. Med. Biol. 1062, 355–360.  
696 [https://doi.org/10.1007/978-981-10-8727-1\\_24](https://doi.org/10.1007/978-981-10-8727-1_24)
- 697 Parisi, M., Lin, H., 1999. The *Drosophila pumilio* gene encodes two functional protein isoforms that play  
698 multiple roles in germline development, gonadogenesis, oogenesis and embryogenesis. Genetics  
699 153, 235–250.
- 700 Pinto, S.B., Stainton, K., Harris, S., Kambris, Z., Sutton, E.R., Bonsall, M.B., Parkhill, J., Sinkins, S.P., 2013.  
701 Transcriptional regulation of *Culex pipiens* mosquitoes by *Wolbachia* influences cytoplasmic  
702 incompatibility. PLoS Pathog. 9, e1003647. <https://doi.org/10.1371/journal.ppat.1003647>

- 703 Rasgon, J.L., 2008. Using Predictive Models to Optimize *Wolbachia*-Based Strategies for Vector-Borne  
704 Disease Control, in: Aksoy, S. (Ed.), Transgenesis and the Management of Vector-Borne Disease.  
705 Springer New York, New York, NY, pp. 114–125. [https://doi.org/10.1007/978-0-387-78225-6\\_10](https://doi.org/10.1007/978-0-387-78225-6_10)
- 706 Reynolds, K.T., Hoffmann, A.A., 2002. Male age, host effects and the weak expression or non-expression  
707 of cytoplasmic incompatibility in *Drosophila* strains infected by maternally transmitted  
708 *Wolbachia*. *Genet. Res.* 80, 79–87.
- 709 Serbus, L.R., Casper-Lindley, C., Landmann, F., Sullivan, W., 2008. The genetics and cell biology of  
710 *Wolbachia*-host interactions. *Annu. Rev. Genet.* 42, 683–707.  
711 <https://doi.org/10.1146/annurev.genet.41.110306.130354>
- 712 Shropshire, J.D., Bordenstein, S.R., 2019. Two-by-one model of cytoplasmic incompatibility: synthetic  
713 recapitulation by transgenic expression of *cifA* and *cifB* in *Drosophila*. *PLOS Genet.* 15,  
714 e1008221. <https://doi.org/10.1371/journal.pgen.1008221>
- 715 Shropshire, J.D., Bordenstein, S.R., 2016. Speciation by symbiosis: the microbiome and behavior. *mBio* 7,  
716 e01785-15. <https://doi.org/10.1128/mBio.01785-15>
- 717 Shropshire, J.D., Leigh, B., Bordenstein, Sarah R., Duploux, A., Riegler, M., Brownlie, J.C., Bordenstein,  
718 Seth R., 2019. Models and nomenclature for cytoplasmic incompatibility: caution over  
719 premature conclusions – a response to Beckmann et al. *Trends Genet.* 0.  
720 <https://doi.org/10.1016/j.tig.2019.03.004>
- 721 Shropshire, J.D., On, J., Layton, E.M., Zhou, H., Bordenstein, S.R., 2018. One prophage WO gene rescues  
722 cytoplasmic incompatibility in *Drosophila melanogaster*. *Proc. Natl. Acad. Sci. U. S. A.* 115, 4987–  
723 4991. <https://doi.org/10.1073/pnas.1800650115>
- 724 Siegmund, T., Lehmann, M., 2002. The *Drosophila* Pipsqueak protein defines a new family of helix-turn-  
725 helix DNA-binding proteins. *Dev. Genes Evol.* 212, 152–157. <https://doi.org/10.1007/s00427-002-0219-2>
- 726
- 727 Taylor, M.J., Bordenstein, S.R., Slatko, B., 2018. Microbe Profile: *Wolbachia*: a sex selector, a viral  
728 protector and a target to treat filarial nematodes. *Microbiology* 164, 1345–1347.  
729 <https://doi.org/10.1099/mic.0.000724>
- 730 Tram, U., Sullivan, W., 2002. Role of delayed nuclear envelope breakdown and mitosis in *Wolbachia*-  
731 induced cytoplasmic incompatibility. *Science* 296, 1124–1126.  
732 <https://doi.org/10.1126/science.1070536>
- 733 Turelli, M., 1994. Evolution of incompatibility-inducing microbes and their hosts. *Evol. Int. J. Org. Evol.*  
734 48, 1500–1513. <https://doi.org/10.1111/j.1558-5646.1994.tb02192.x>
- 735 Weidmann, C.A., Goldstrohm, A.C., 2012. *Drosophila* Pumilio Protein Contains Multiple Autonomous  
736 Repression Domains That Regulate mRNAs Independently of Nanos and Brain Tumor. *Mol. Cell.*  
737 *Biol.* 32, 527–540. <https://doi.org/10.1128/MCB.06052-11>
- 738 Weinert, L.A., Araujo-Jnr, E.V., Ahmed, M.Z., Welch, J.J., 2015. The incidence of bacterial endosymbionts  
739 in terrestrial arthropods. *Proc R Soc B* 282, 20150249. <https://doi.org/10.1098/rspb.2015.0249>
- 740 Wong Sak Hoi, J., Dumas, B., 2010. Ste12 and Ste12-Like Proteins, Fungal Transcription Factors  
741 Regulating Development and Pathogenicity. *Eukaryot. Cell* 9, 480–485.  
742 <https://doi.org/10.1128/EC.00333-09>
- 743 Yamada, R., Floate, K.D., Riegler, M., O'Neill, S.L., 2007. Male development time influences the strength  
744 of *Wolbachia*-induced cytoplasmic incompatibility expression in *Drosophila melanogaster*.  
745 *Genetics* 177, 801–808. <https://doi.org/10.1534/genetics.106.068486>
- 746 Yang, H., Ahmad, Z.A., Song, Y., 2020. Molecular insight for the role of key residues of calreticulin in its  
747 binding activities: A computational study. *Comput. Biol. Chem.* 85, 107228.  
748 <https://doi.org/10.1016/j.combiolchem.2020.107228>
- 749 Yu, B., Huang, Z., 2015. Variations in Antioxidant Genes and Male Infertility. *BioMed Res. Int.* 2015.  
750 <https://doi.org/10.1155/2015/513196>

- 751 Zhang, Y., 2009. I-TASSER: fully automated protein structure prediction in CASP8. *Proteins* 77 Suppl 9,  
752 100–113. <https://doi.org/10.1002/prot.22588>
- 753 Zheng, X., Zhang, D., Li, Y., Yang, C., Wu, Y., Liang, X., Liang, Y., Pan, X., Hu, L., Sun, Q., Wang, X., Wei, Y.,  
754 Zhu, J., Qian, W., Yan, Z., Parker, A.G., Gilles, J.R.L., Bourtzis, K., Bouyer, J., Tang, M., Zheng, B.,  
755 Yu, J., Liu, J., Zhuang, J., Hu, Zhigang, Zhang, M., Gong, J.-T., Hong, X.-Y., Zhang, Z., Lin, L., Liu, Q.,  
756 Hu, Zhiyong, Wu, Z., Baton, L.A., Hoffmann, A.A., Xi, Z., 2019. Incompatible and sterile insect  
757 techniques combined eliminate mosquitoes. *Nature*. [https://doi.org/10.1038/s41586-019-1407-](https://doi.org/10.1038/s41586-019-1407-9)  
758 9
- 759 Zheng, Y., Shen, W., Bi, J., Chen, M.-Y., Wang, R.-F., Ai, H., Wang, Y.-F., 2019. Small RNA analysis provides  
760 new insights into cytoplasmic incompatibility in *Drosophila melanogaster* induced by *Wolbachia*.  
761 *J. Insect Physiol.* 118, 103938. <https://doi.org/10.1016/j.jinsphys.2019.103938>
- 762 Zug, R., Hammerstein, P., 2015. *Wolbachia* and the insect immune system: what reactive oxygen species  
763 can tell us about the mechanisms of *Wolbachia*–host interactions. *Front. Microbiol.* 6.  
764 <https://doi.org/10.3389/fmicb.2015.01201>
- 765 Zug, R., Hammerstein, P., 2012. Still a host of hosts for *Wolbachia*: analysis of recent data suggests that  
766 40% of terrestrial arthropod species are infected. *PLOS ONE* 7, e38544.  
767 <https://doi.org/10.1371/journal.pone.0038544>  
768  
769

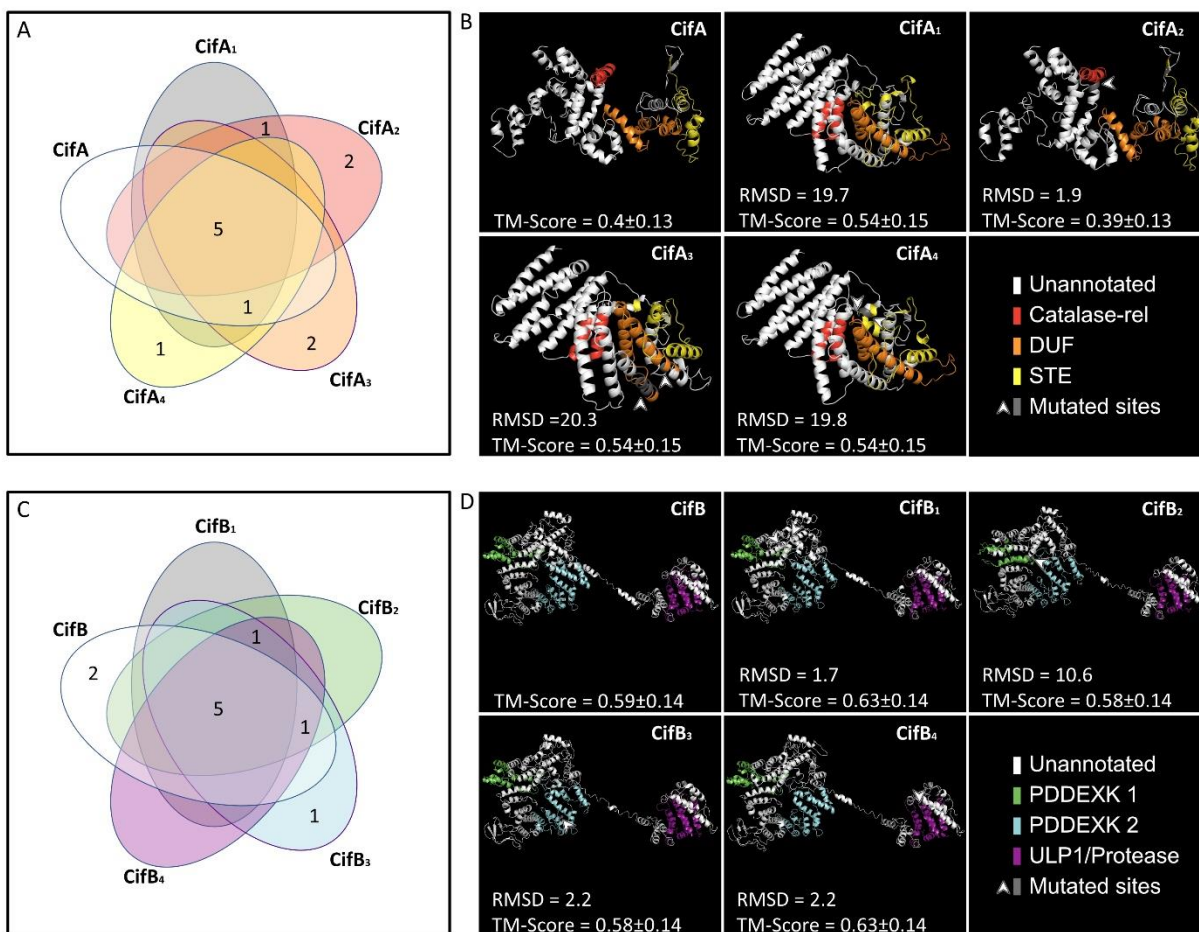

770  
 771 **Figure S1. Summary of I-TASSER structural predictions for CifA, CifB, and their mutants.** (A, C) Venn-diagrams showing the  
 772 number of PDB hits shared between wild-type and mutant (A) CifA and (C) CifB proteins. (B, D) I-TASSER uses these PDB hits to  
 773 generate structural predictions for (C) CifA and (D) CifB. TM-scores range from 0-1 where 1 is the highest confidence. RMSD scores  
 774 are from pairwise alignments of mutant proteins with the wild-type in PyMol. Higher RMSD scores represent more distance between  
 775 the superimposed proteins. Mutated sites in the tertiary structure are indicated with a white arrow. Domain annotations were based  
 776 on previous sequence analyses (Lindsey et al., 2018). Details regarding the PDB hits are reported in Table S2.  
 777

778 **Table S1.** P values associated with all statistical comparisons made in main and extended data hatch rate and cytology figures.  
 779 M=male, F=female, +=Wolbachia infected, -=Wolbachia uninfected.

780 **Table S2.** Protein structural prediction software I-TASSER identifies homologous protein domains found in all of our Cif homologs,  
 781 and those that differ.

782 **Table S3.** Nucleotide and protein sequences used in this study.

783 **Table S4.** Primers used for genotyping and sanger sequencing of cif transgenes.

784 **Source Data File 1.** All raw data from main figures, supplemental figures, and replicate data experiments in this study.
